# Supplementary material
Source: PubMed Central journal article supplement (PMC4116692)

270kDa

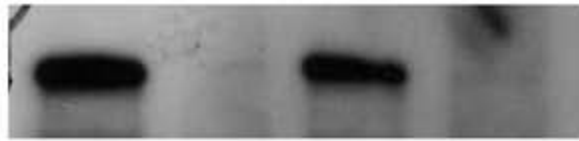

IB: anti-FASN

|        |         |        |         |
|--------|---------|--------|---------|
| PC3    | PC3     | DU145  | DU145   |
| Whole  | Nuc     | Whole  | Nuc     |
| Cell   | extract | Cell   | extract |
| lysate |         | lysate |         |

Supplement: mmc1.pdf [file mmc1.pdf]

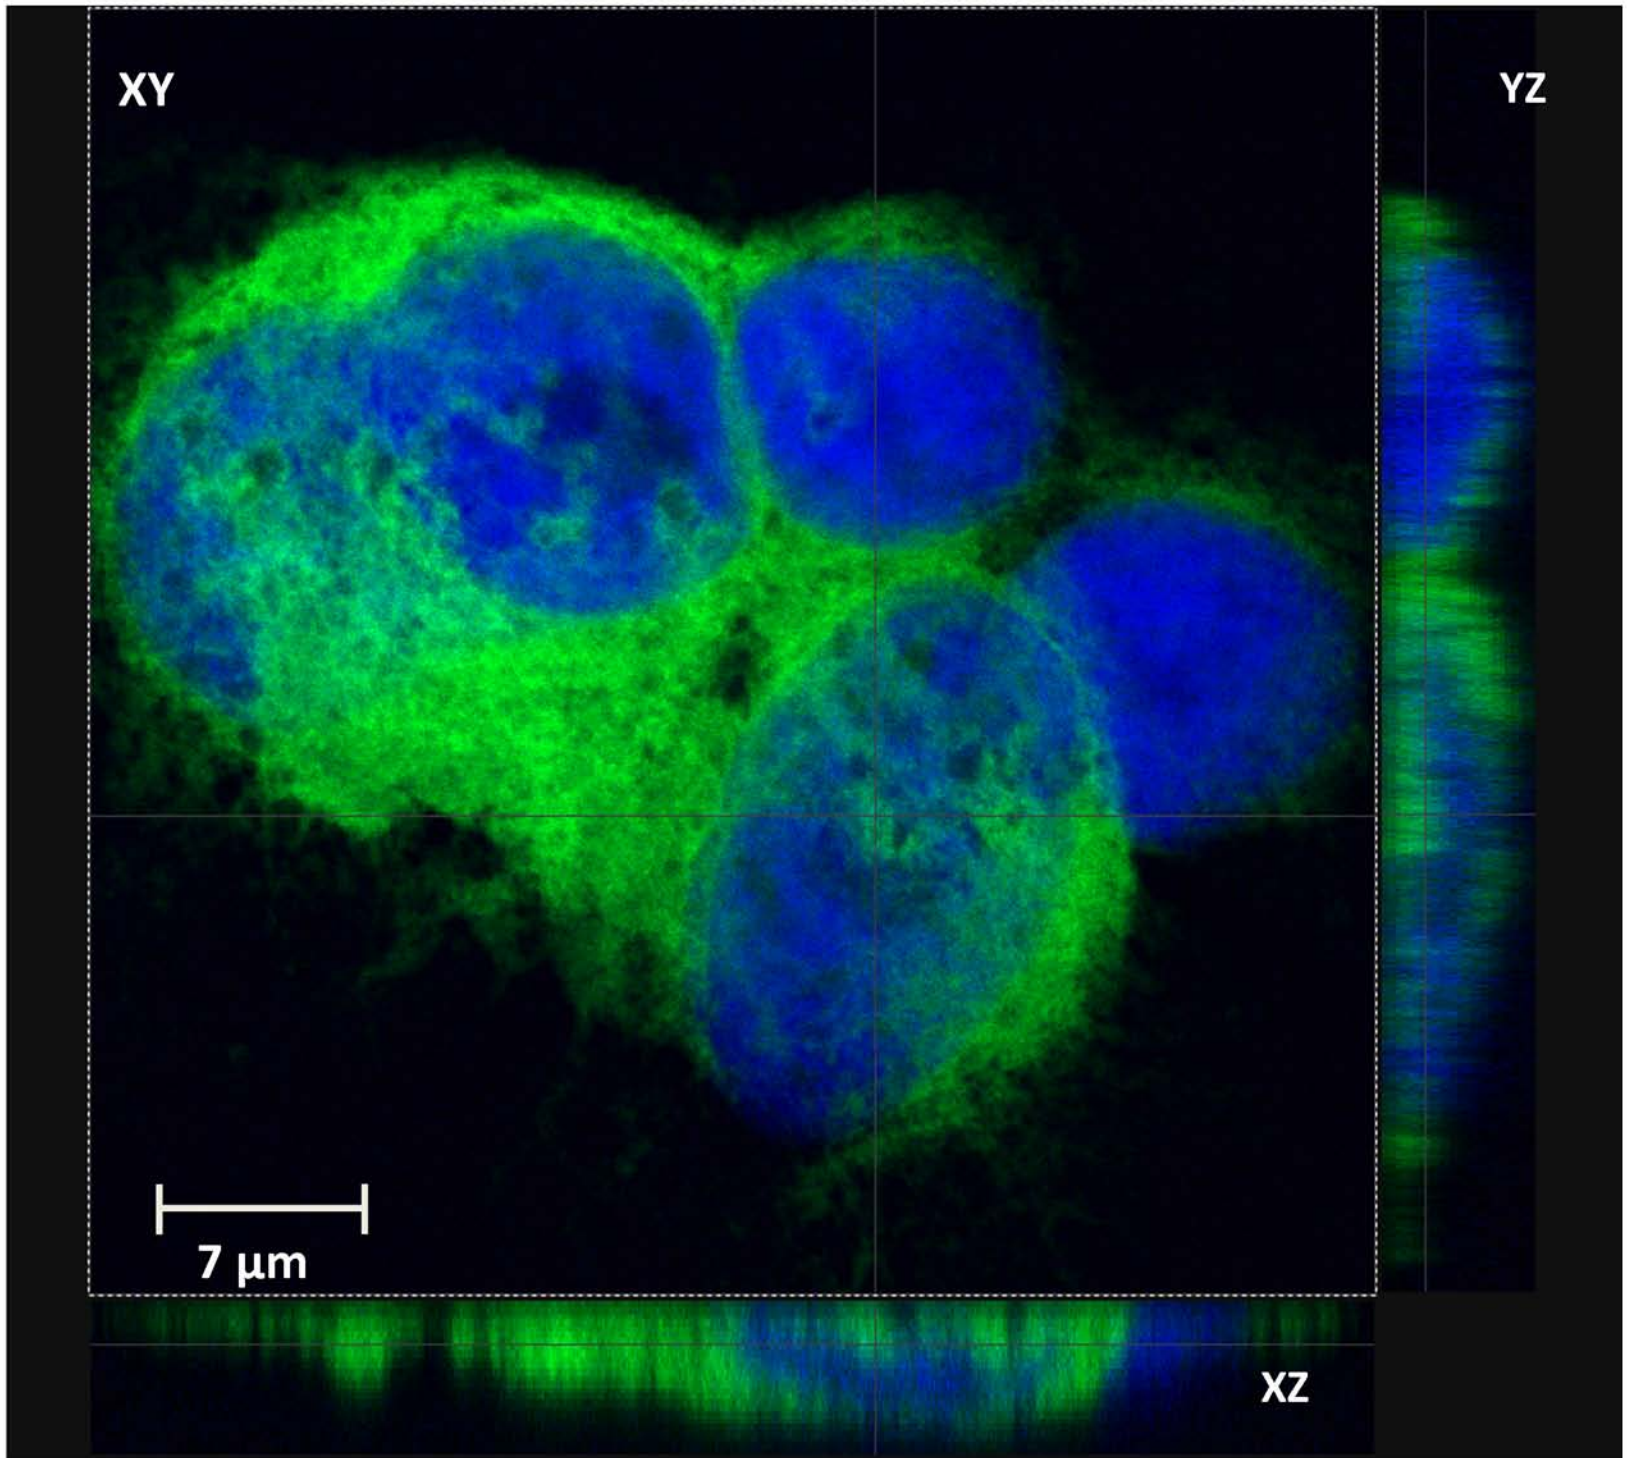

Supplement: mmc2.pdf [file mmc2.pdf]
